# Supplementary material
Source: ML conference proceedings conference paper supplement (https://openreview.net/forum?id=rD7guYi6jZ)
Supplement: supplementary_material [file attachment]

# Supplementary Materials: Efficient Training for Multilingual Visual Speech Recognition: Pre-training with Discretized Visual Speech Representation

Anonymous Authors

## 1 VISUALIZATION OF SPEECH UNITS

Fig. 1 shows the visualization of all 1,000 units of both the audio speech units and the visual speech units. In visual speech units, more units are classified as vowels while audio speech units have more distinct phonemes. As we discussed before, the ambiguity of lip movements is reflected in the figure.

## 2 DATASET STATISTICS FOR EACH LANGUAGE

The dataset statistics for each language are shown in Table 1. Please note that there are only 181,034 non-English human-labeled videos (*i.e.*, mTEDx). Therefore, we increase the quantity of labeled data by utilizing the automatic labels proposed by [1, 2]. With this, we can construct 2,014,212 multilingual video-text paired data. The number of these automatic labels can be found in the ‘Auto-labeled # of Video’ column in the table.

| Language | Dataset   | Human-labeled<br># of Video | Auto-labeled<br># of Video | Hours | Total<br>Hours |
|----------|-----------|-----------------------------|----------------------------|-------|----------------|
| En       | LRS2      | 142,157                     | -                          | 223   | 3,481          |
|          | LRS3      | 150,498                     | -                          | 433   |                |
|          | VoxCeleb2 | -                           | 628,418                    | 1,326 |                |
|          | AVSpeech  | -                           | 837,044                    | 1,499 |                |
| Es       | mTEDx     | 44,532                      | -                          | 72    | 384            |
|          | VoxCeleb2 | -                           | 22,682                     | 42    |                |
|          | AVSpeech  | -                           | 151,173                    | 270   |                |
| It       | mTEDx     | 26,018                      | -                          | 46    | 152            |
|          | VoxCeleb2 | -                           | 19,261                     | 38    |                |
|          | AVSpeech  | -                           | 38,227                     | 68    |                |
| Fr       | mTEDx     | 58,426                      | -                          | 85    | 331            |
|          | VoxCeleb2 | -                           | 66,943                     | 124   |                |
|          | AVSpeech  | -                           | 69,020                     | 122   |                |
| Pt       | mTEDx     | 52,058                      | -                          | 82    | 420            |
|          | VoxCeleb2 | -                           | 4,843                      | 9     |                |
|          | AVSpeech  | -                           | 176,601                    | 329   |                |
| De       | VoxCeleb2 | -                           | -                          | 190   | 333            |
|          | AVSpeech  | -                           | -                          | 143   |                |
| Ru       | VoxCeleb2 | -                           | -                          | 2     | 288            |
|          | AVSpeech  | -                           | -                          | 286   |                |
| Ar       | VoxCeleb2 | -                           | -                          | 7     | 114            |
|          | AVSpeech  | -                           | -                          | 107   |                |
| El       | VoxCeleb2 | -                           | -                          | 1     | 9              |
|          | AVSpeech  | -                           | -                          | 8     |                |

Table 1: Data statistics of each language used in this work including automatic labels.

## 3 DETAILED TRAINING SETUP

We provide the detailed training setup used for experiments in Table 2. For pre-training mAV-HuBERT, we use a polynomial decay Learning Rate (LR) scheduler, batch size of 1,000 frames for each GPU, and train steps of 350k. For pre-training with the visual speech unit, we use 3,000 frames per GPU even though we can increase it to 6,000 frames. During finetuning, the pre-trained encoder is frozen for 10k steps and 7.2k steps for multilingual finetuning.

## 4 EXAMPLES OF PREDICTED SENTENCES

We show some examples of predicted transcriptions by the proposed multilingual VSR model and ground-truth transcriptions in Fig. 2. For each language, we show two examples. The red-colored words indicate the deletion error and the blue-colored words indicate the wrong prediction (*i.e.*, insertion or substitution)

## REFERENCES

- [1] Pingchuan Ma, Alexandros Haliassos, Adriana Fernandez-Lopez, Honglie Chen, Stavros Petridis, and Maja Pantic. 2023. Auto-AVSR: Audio-visual speech recognition with automatic labels. In *ICASSP 2023-2023 IEEE International Conference on Acoustics, Speech and Signal Processing (ICASSP)*. IEEE, 1–5.
- [2] Jeong Hun Yeo, Minsu Kim, Shinji Watanabe, and Yong Man Ro. 2023. Visual Speech Recognition for Low-resource Languages with Automatic Labels From Whisper Model. *arXiv preprint arXiv:2309.08535* (2023).

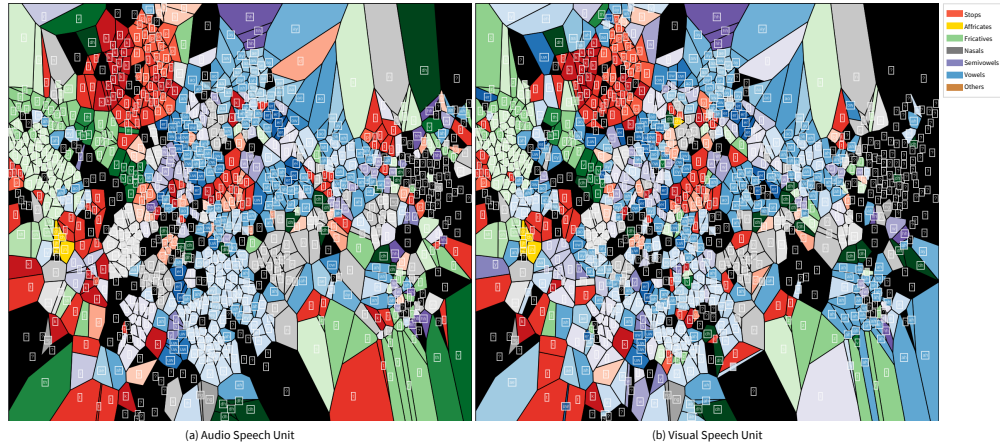

Figure 1: Visualization of speech units. Each boundary represents a single unit and the same color represents the same phoneme or phoneme family. (a) Audio speech unit. (b) Visual speech unit.

|                             | Pre-training<br>(mAV-HuBERT) | Pre-training<br>(Visual speech unit to<br>text translation) | Fine-tuning<br>(Multilingual) | Fine-tuning<br>(Monolingual) |
|-----------------------------|------------------------------|-------------------------------------------------------------|-------------------------------|------------------------------|
| # of epochs                 | 40                           | 11                                                          | 8                             | -                            |
| # of steps                  | 350,000                      | 60,000                                                      | 120,000                       | 60,000                       |
| # of frozen steps           | -                            | -                                                           | 10,000                        | 7,200                        |
| # of GPUs                   | 64                           | 32                                                          | 32                            | 8                            |
| Max frames / batch          | 1000                         | 3000                                                        | 1000                          | 1000                         |
| LR scheduler                | polynomial decay             | tri-stage                                                   | tri-stage                     | tri-stage                    |
| warmup updates              | 48,000                       | 15,000                                                      | 15,000                        | 15,000                       |
| peak learning rate          | 2e-3                         | 1e-3                                                        | 4e-4                          | 4e-4                         |
| Adam ( $\beta_1, \beta_2$ ) | (0.9, 0.98)                  | (0.9, 0.98)                                                 | (0.9, 0.98)                   | (0.9, 0.98)                  |

Table 2: Details of hyperparameters used in training.

|                    |               |                                                                              |
|--------------------|---------------|------------------------------------------------------------------------------|
| English<br>(En)    | Ground Truth: | the choices don't make sense because it's the wrong question                 |
|                    | Prediction:   | choices don't make sense because it's the wrong question                     |
|                    | Ground Truth: | this is not a statement on malnutrition or anything else                     |
|                    | Prediction:   | this is not a statement on malnutrition or anything                          |
| Spanish<br>(Es)    | Ground Truth: | si os digo la verdad hasta hace poco no me habia hecho esa pregunta          |
|                    | Prediction:   | yo sigo la verdad que hasta hace pocos me habia hecho esa pregunta           |
|                    | Ground Truth: | los papелitos oficiales están a la venta desde ahora corran que se acaban    |
|                    | Prediction:   | los preparatos oficiales están en la venta desde ahora corren que sacaban    |
| Italian<br>(It)    | Ground Truth: | ed è molto diversa dalle precedenti per almeno cinque motivi                 |
|                    | Prediction:   | era molto diversa dalle precedenti perché erano cinque motivi                |
|                    | Ground Truth: | ora andiamo nella parrocchia di quartiere a corso francia                    |
|                    | Prediction:   | ora andiamo nella persona di quel diritto su francia                         |
| French<br>(Fr)     | Ground Truth: | et je vais vous en citer trois mais il y en a énormément                     |
|                    | Prediction:   | et je vais vous enregistrer trois milieux énorméments                        |
|                    | Ground Truth: | ça cest le maître mot de l'évolution et des espèces qui veulent survivre     |
|                    | Prediction:   | ça cest de mettre le bonheur de l'évolution des espèces qui veulent survivre |
| Portuguese<br>(Pt) | Ground Truth: | e na puberdade a gente usa muito o método científico                         |
|                    | Prediction:   | e nesse momento a gente usa muito mais um científico                         |
|                    | Ground Truth: | se um dia tu pudesse conhecer alguma pessoa quem seria essa pessoa           |
|                    | Prediction:   | se o jeito pudesse conhecer alguma pessoa crescer nessa pessoa               |

Figure 2: Example sentences predicted from the single proposed multilingual VSR model on LRS3 and mTEDx test set. The Red and Blue indicate deletion and wrong predicted words, respectively.
